# Supplementary material for: A Rapid, Sensitive, and Portable Biosensor Assay for the Detection of Botulinum Neurotoxin Serotype A in Complex Food Matrices
Source: MDPI journal article supplement (doi:10.3390/toxins10110476), 2018-11-15
Supplement: s1 [file s1]

# Supplementary Materials: A Rapid, Sensitive, and Portable Biosensor Assay for the Detection of Botulinum Neurotoxin Serotype A in Complex Food Matrices

Christina C. Tam, Andrew R. Flannery and Luisa W. Cheng

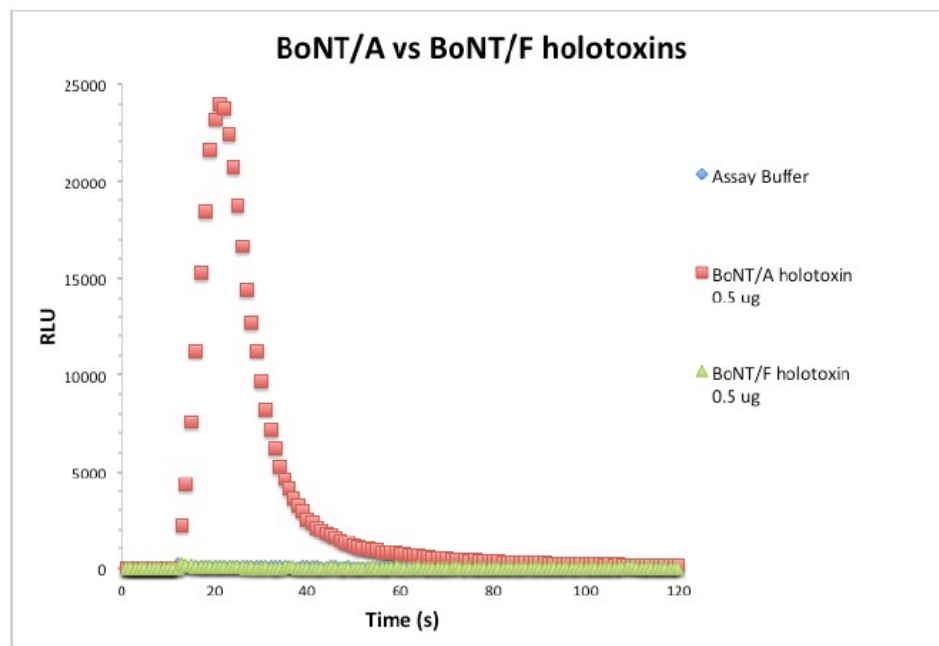

**Figure S1.** CANARY® biosensor assay specifically detects BoNT/A holotoxin in assay buffer but not BoNT/F holotoxin. 0.5 ug in 50  $\mu$ L (1 mg/mL) was used. One experiment with one reaction per condition was tested.

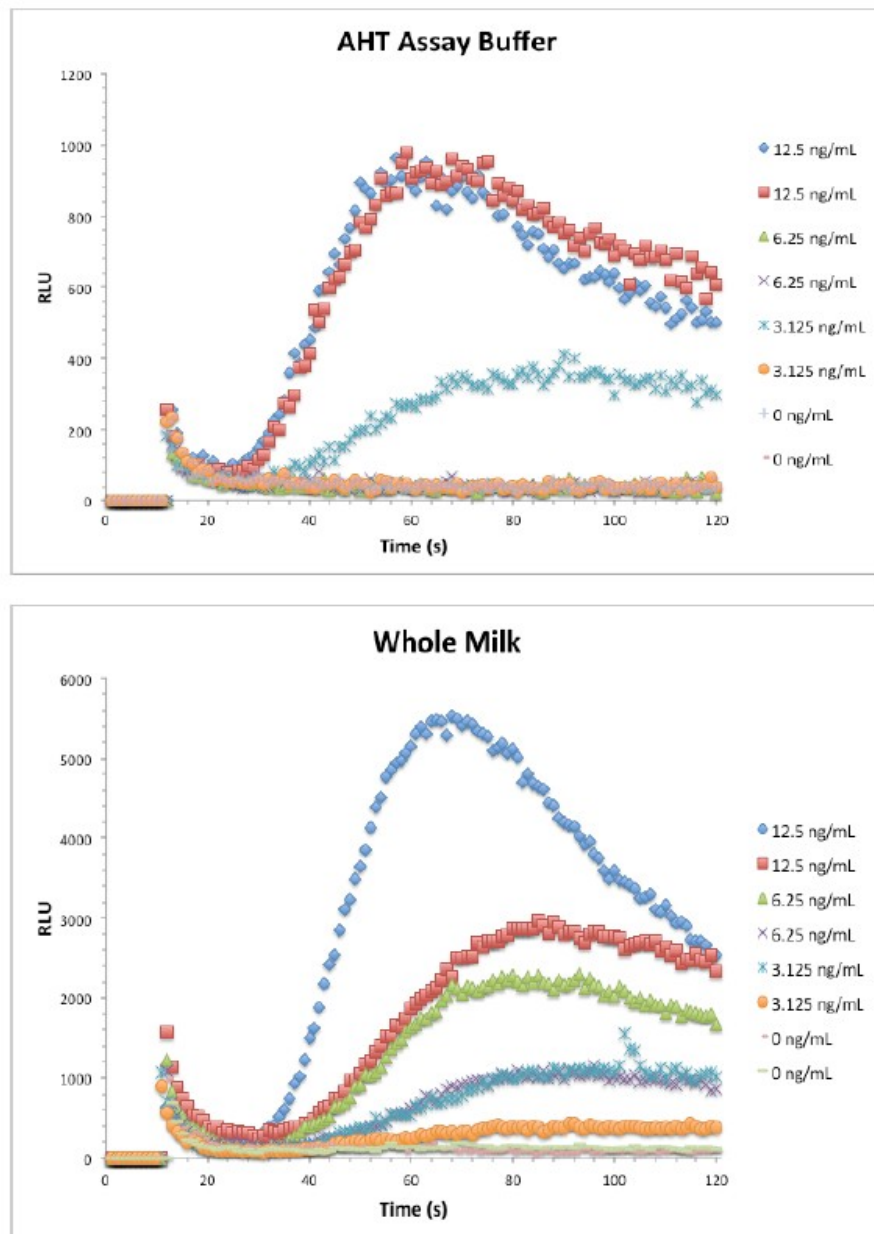

**Figure S2.** CANARY<sup>®</sup> biosensor assay specifically detects BoNT/A holotoxin (AHT) in assay buffer and whole milk. BoNT/A holotoxin was tested in 11  $\mu$ L reaction mixtures with biosensors. Doses were tested in duplicates for each independent experiment.

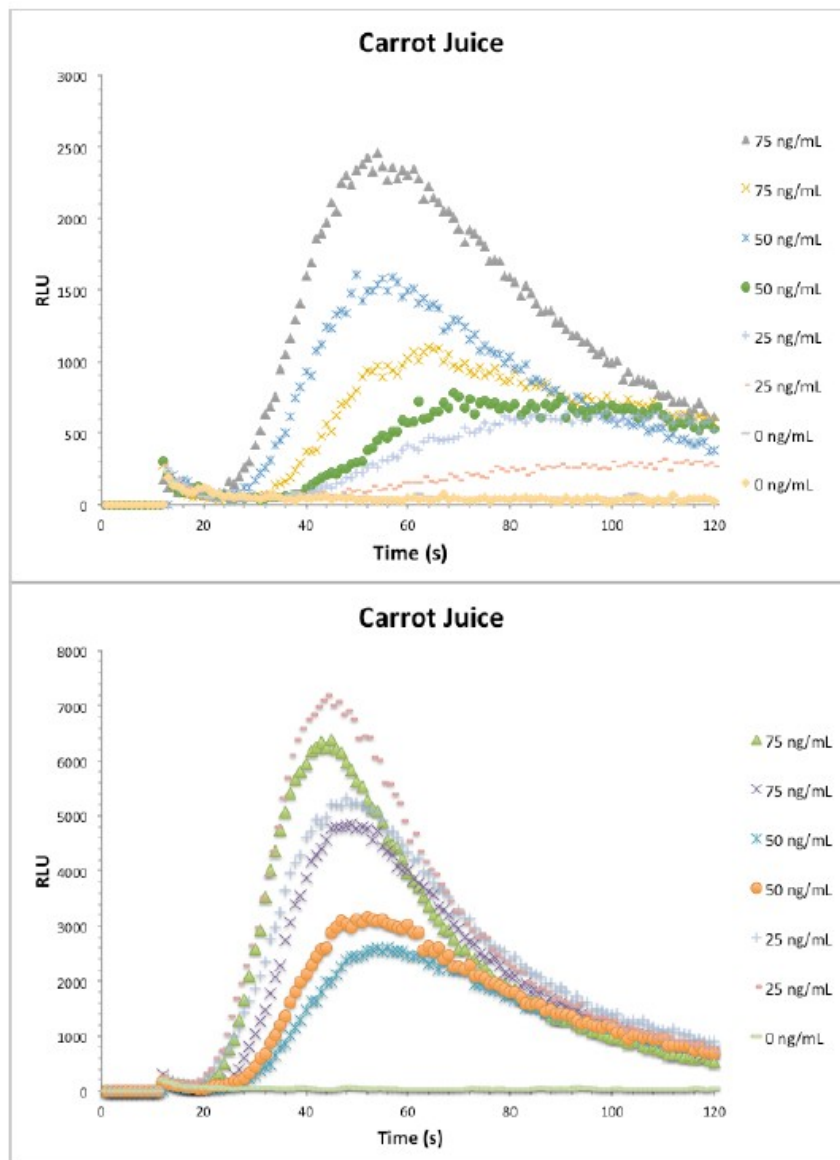

**Figure S3.** CANARY® biosensor assay specifically detects BoNT/A complex in spiked and then neutralized carrot juice. BoNT/A complex was tested in 50  $\mu$ L reaction mixtures with biosensors. Doses were tested in duplicates for each independent experiment.

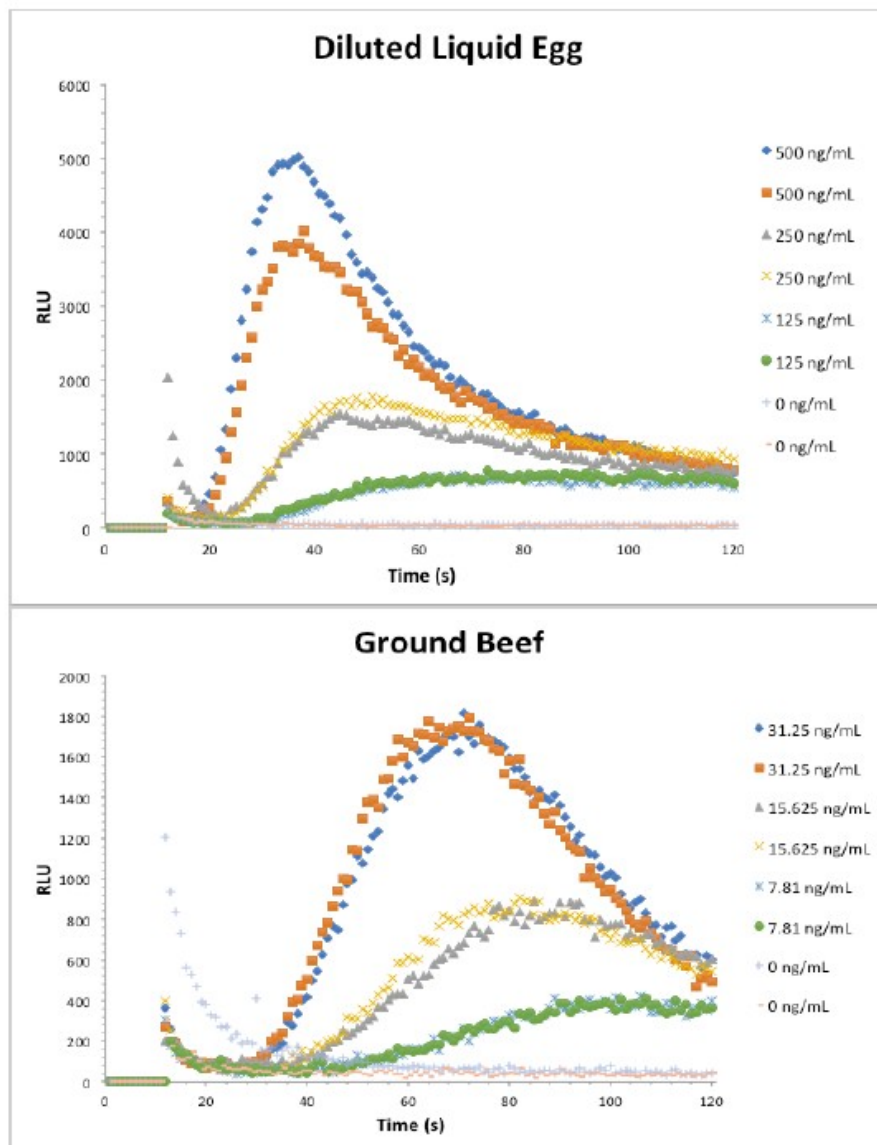

**Figure S4.** CANARY® biosensor assay specifically detects BoNT/A complex in diluted liquid egg and ground beef. BoNT/A complex was tested in 50  $\mu$ L reaction mixtures with biosensors. Doses were tested in duplicates for each independent experiment.

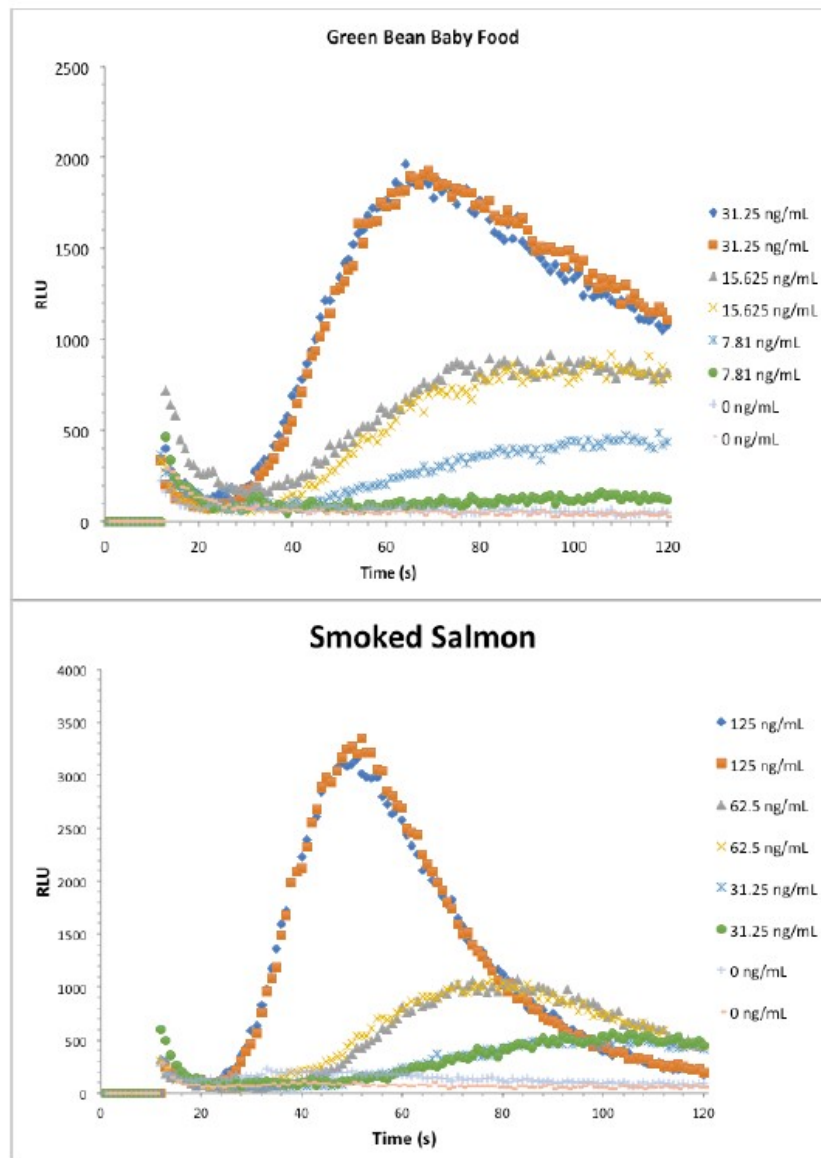

**Figure S5.** CANARY<sup>®</sup> biosensor assay specifically detects BoNT/A complex in green bean baby food and smoked salmon. BoNT/A complex was tested in 50  $\mu$ L reaction mixtures with biosensors. Doses were tested in duplicates for each independent experiment.
